# Supplementary material for: Chemical Composition, Biomolecular Analysis, and Nuclear Magnetic Resonance Spectroscopic Fingerprinting of Posidonia oceanica and Ascophyllum nodosum Extracts
Source: MDPI journal article supplement (doi:10.3390/metabo13020170), 2023-01-24
Supplement: s1 [file s1]

**ESTRAZIONE 1: FIG.1-3 PO ROOTS, FIG. 4-6 PO LEAVES, FIG.7-9 PO RESIDUES, FIG.10-12 AN**

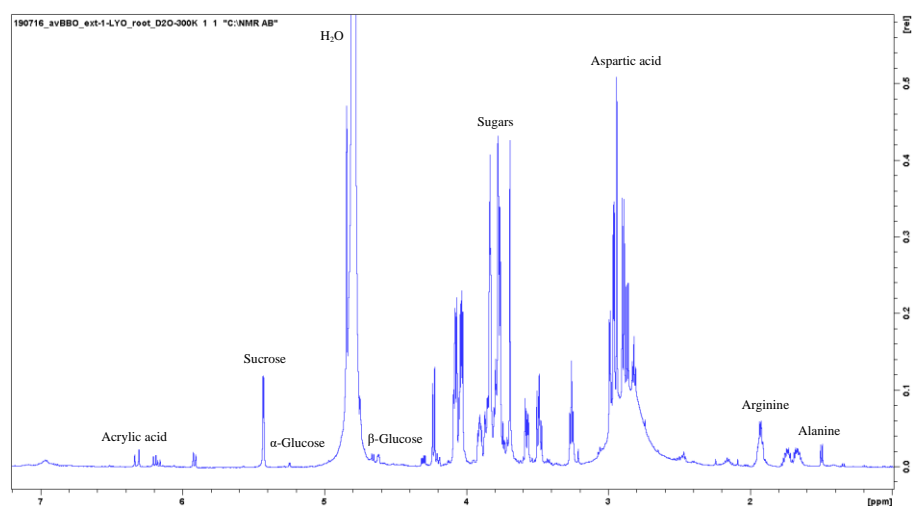

**Figure S1** Extraction 1, 1D  $^1\text{H}$ -NMR of PO Roots

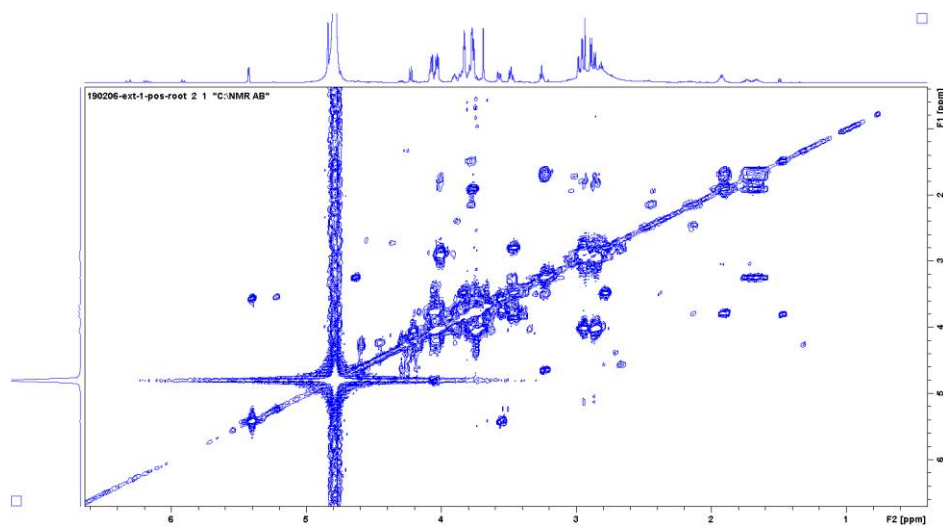

**Figure S2** Extraction 1, 2D  $^1\text{H}$ - $^1\text{H}$ -NMR COSY of PO Roots

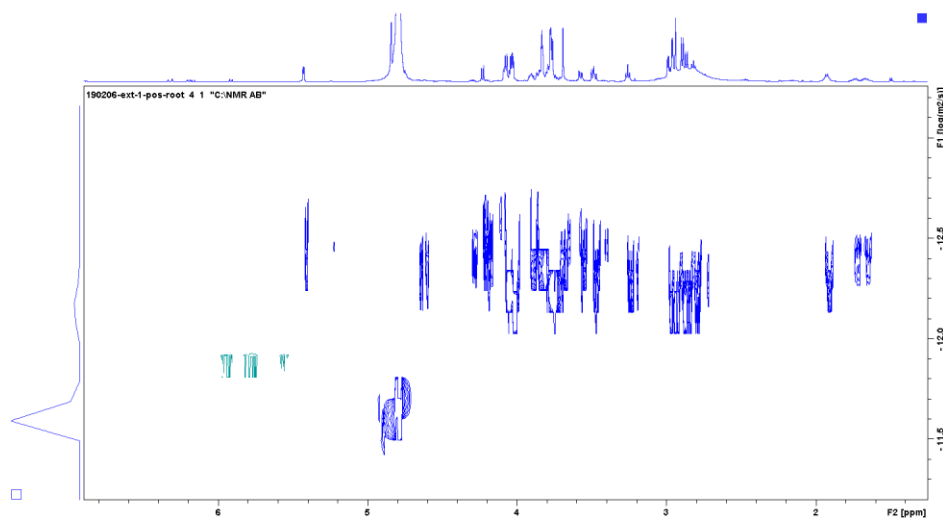

**Figure S3** Extraction 1, 2D  $^1\text{H}$ - $^1\text{H}$ -NMR COSY of PO Roots

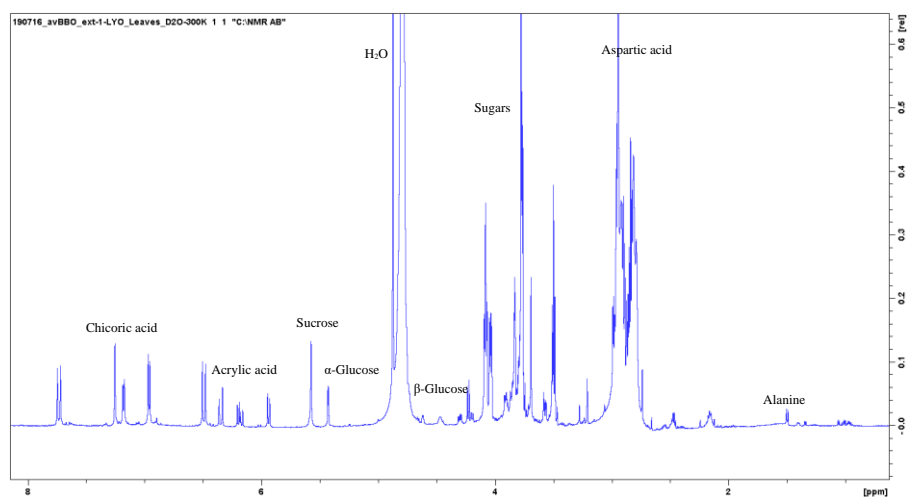

**Figure S4** Extraction 1, 1D  $^1\text{H}$ -NMR of PO Leaves

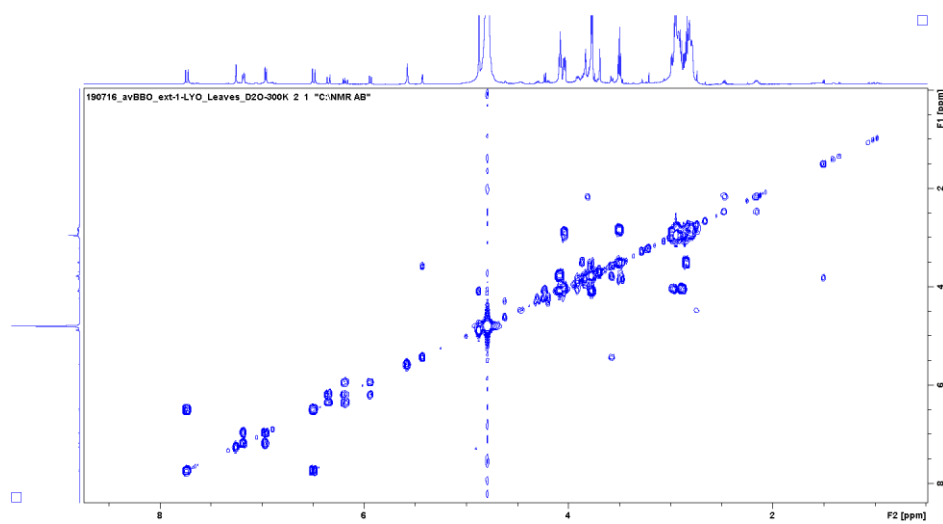

**Figure S5** Extraction 1, 2D  $^1\text{H}$ - $^1\text{H}$ -NMR COSY of PO Leaves

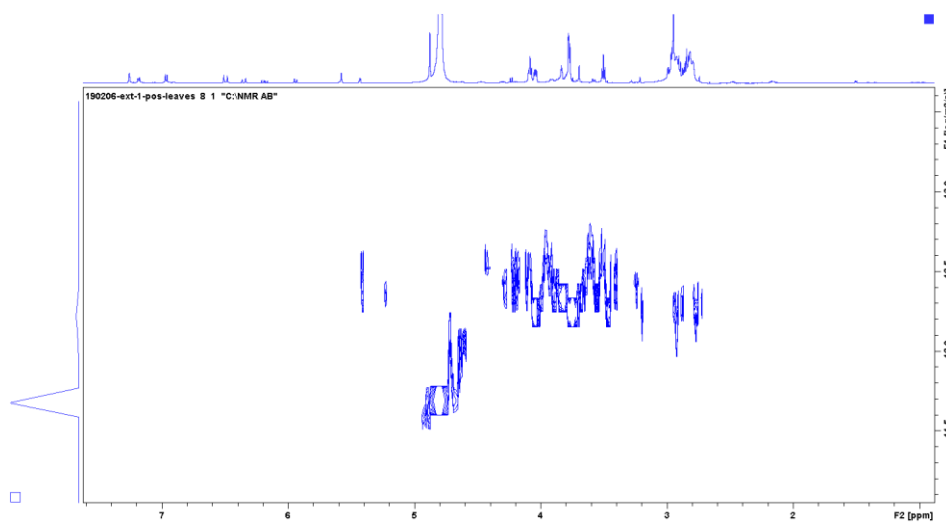

**Figure S6** Extraction 1, 2D  $^1\text{H}$ - $^1\text{H}$ -NMR DOSY of PO Leaves

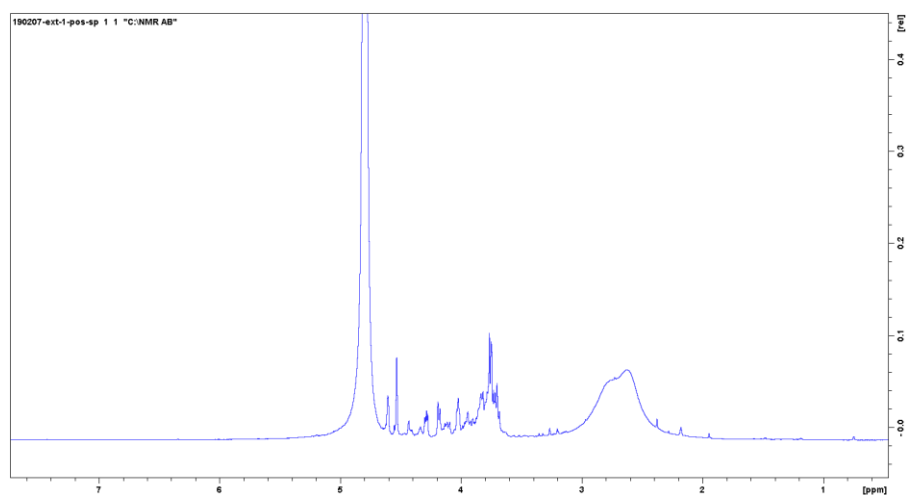

**Figure S7** Extraction 1, 1D  $^1\text{H}$ -NMR of PO Residues

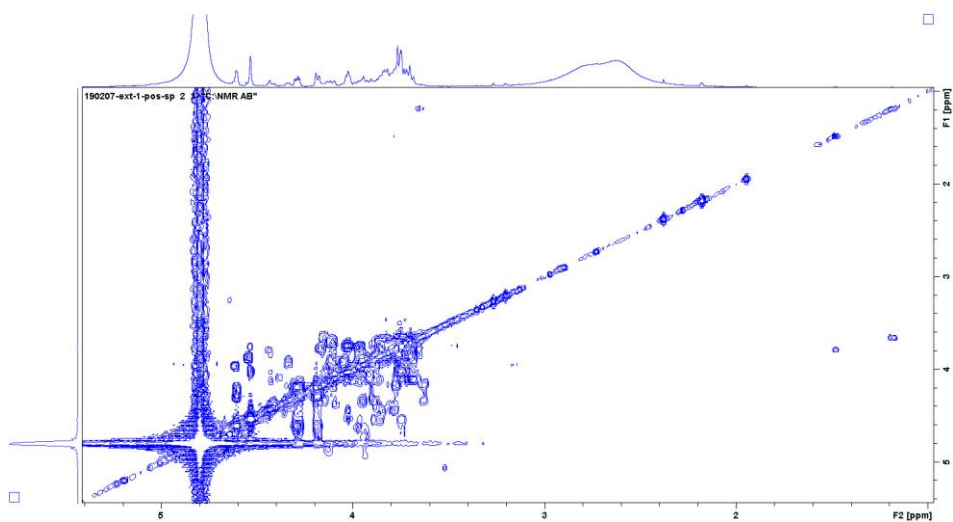

**Figure S8** Extraction 1, 2D  $^1\text{H}$ - $^1\text{H}$ -NMR COSY of PO Residues

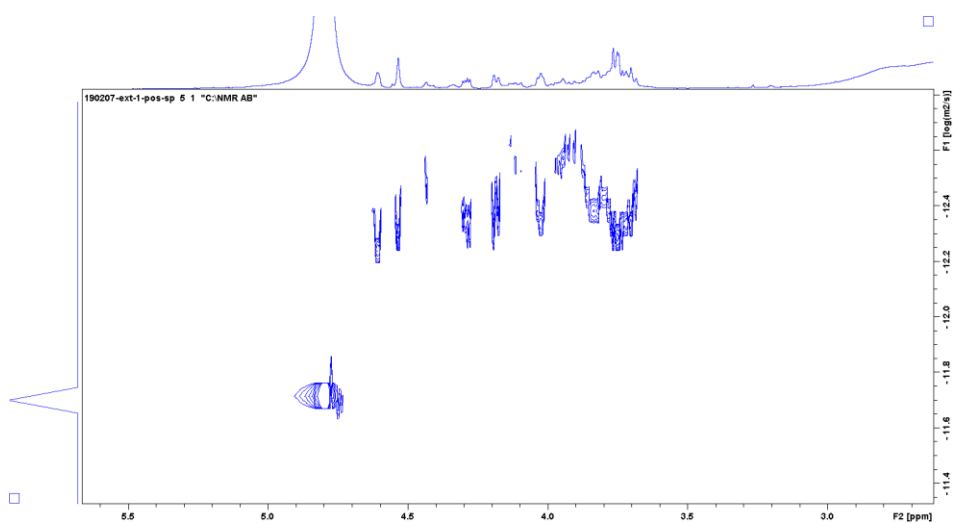

**Figure S9** Extraction 1, 2D  $^1\text{H}$ - $^1\text{H}$ -NMR DOSY of PO Residues

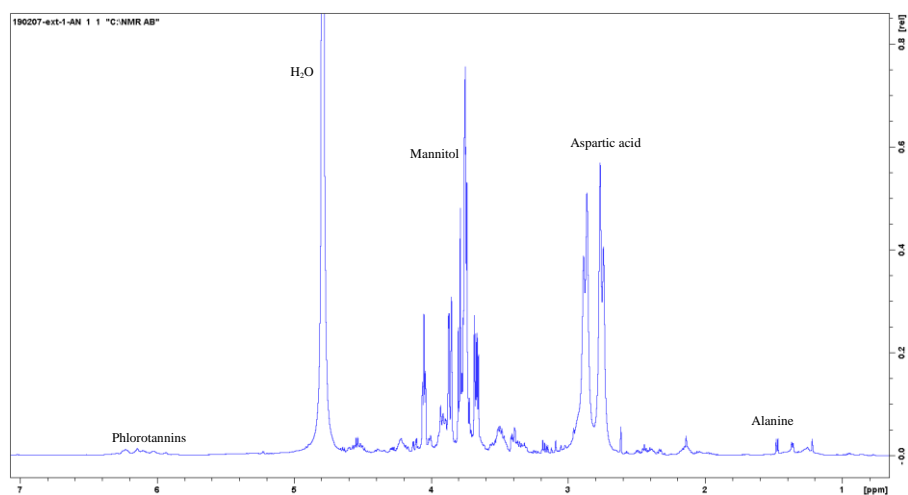

**Figure S10** Extraction 1, 1D  $^1\text{H}$ -NMR of AN

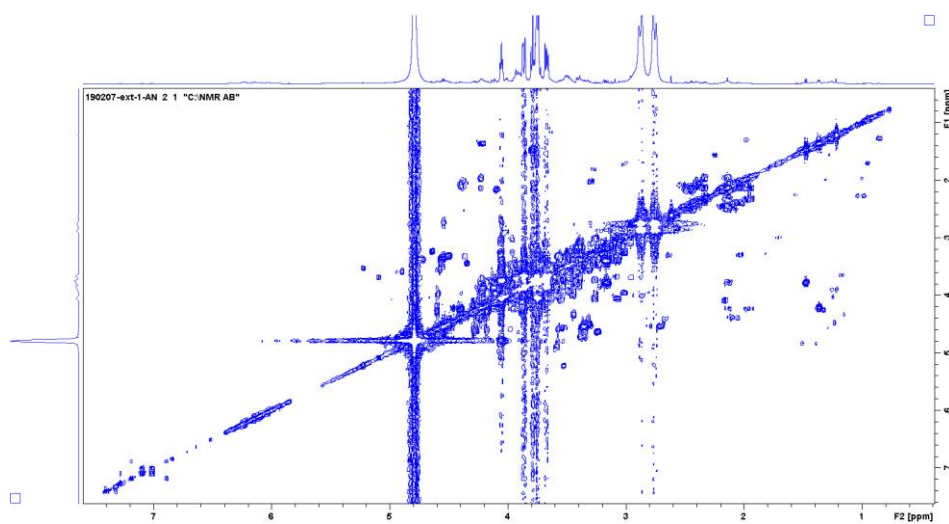

**Figure S11** Extraction 1, 2D  $^1\text{H}$ - $^1\text{H}$ -NMR COSY of AN

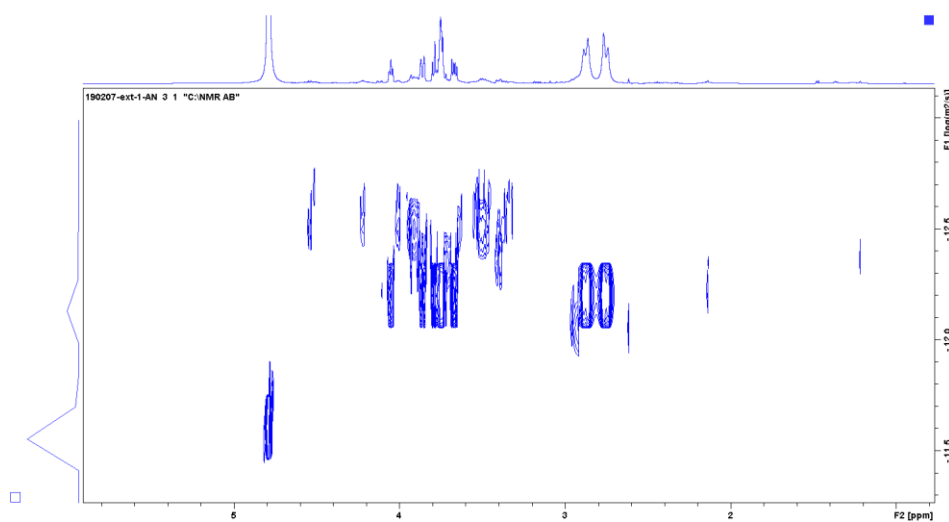

**Figure S12** Extraction 1, 2D  $^1\text{H}$ - $^1\text{H}$ -NMR DOSY of AN

**ESTRAZIONE 2: FIG.13-15 PO ROOTS, FIG. 16-18 PO LEAVES, FIG.19-21 PO RESIDUES, FIG.22-24 AN**

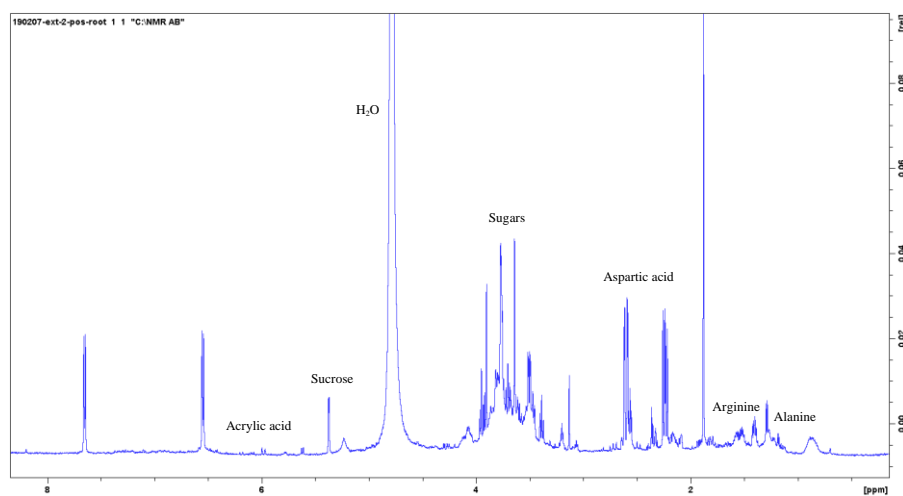

**Figure S13** Extraction 2, 1D  $^1\text{H}$ -NMR of PO Roots

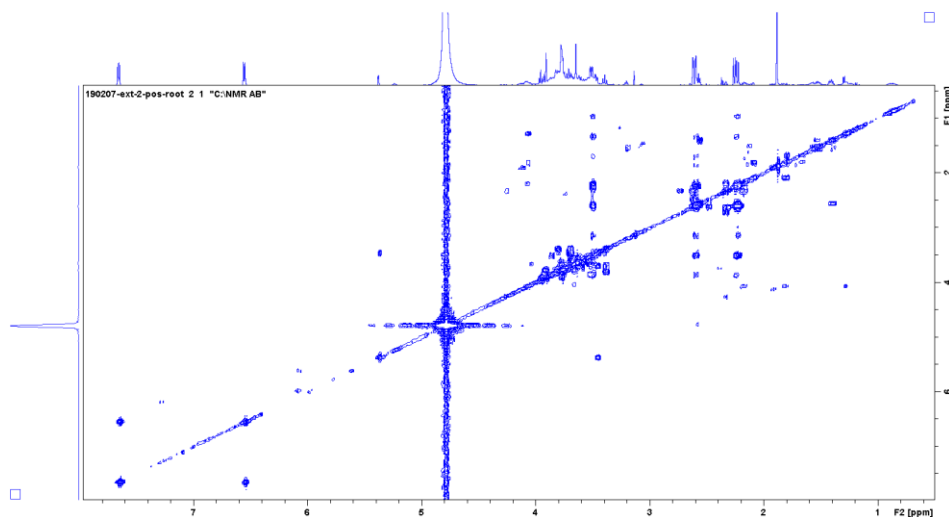

**Figure S14** Extraction 2, 2D  $^1\text{H}$ - $^1\text{H}$ -NMR COSY of PO Roots

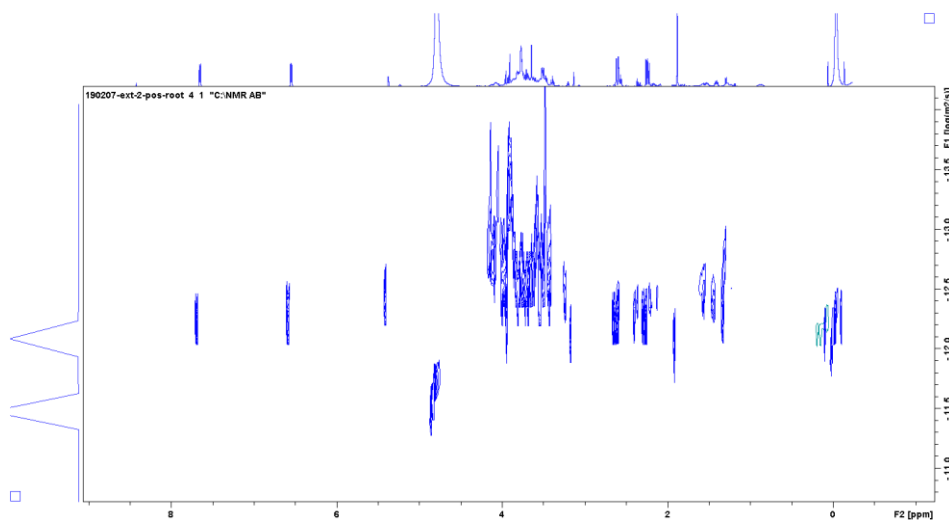

**Figure S15** Extraction 2, 2D  $^1\text{H}$ - $^1\text{H}$ -NMR DOSY of PO Roots

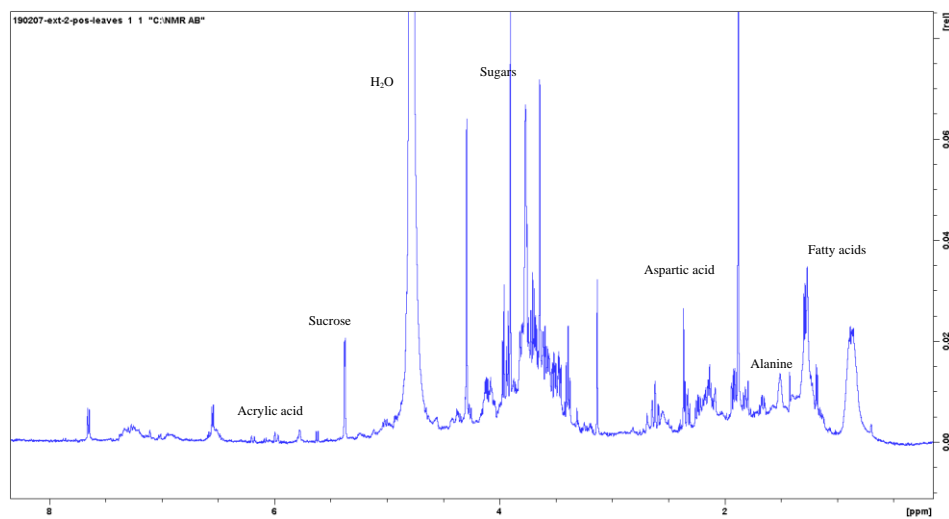

**Figure S16** Extraction 2, 1D  $^1\text{H}$ -NMR of PO Leaves

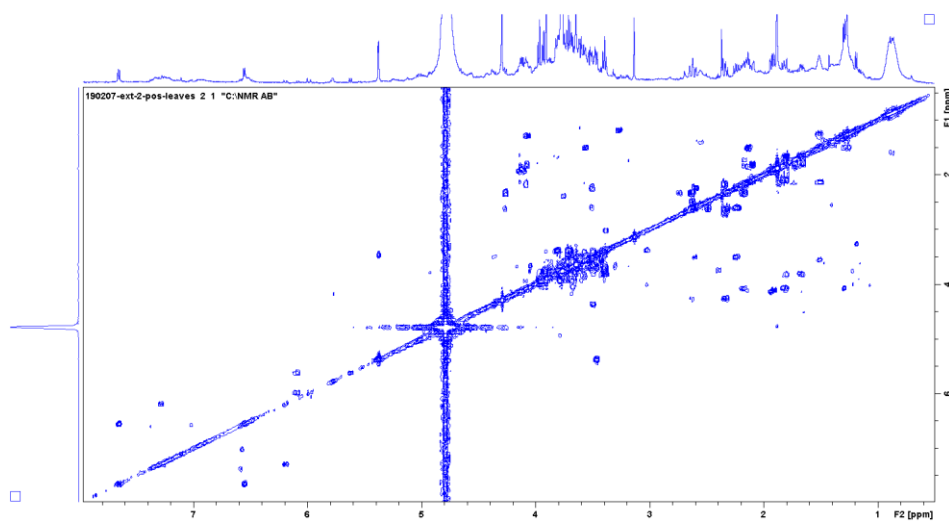

**Figure S17** Extraction 2, 2D  $^1\text{H}$ - $^1\text{H}$ -NMR COSY of PO Leaves

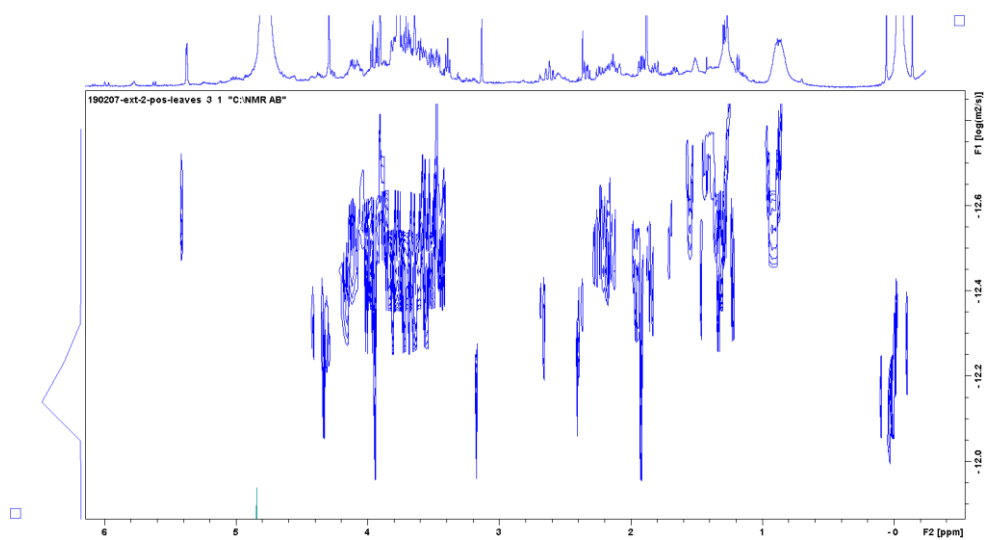

**Figure S18** Extraction 2, 2D  $^1\text{H}$ - $^1\text{H}$ -NMR DOSY of PO Leaves

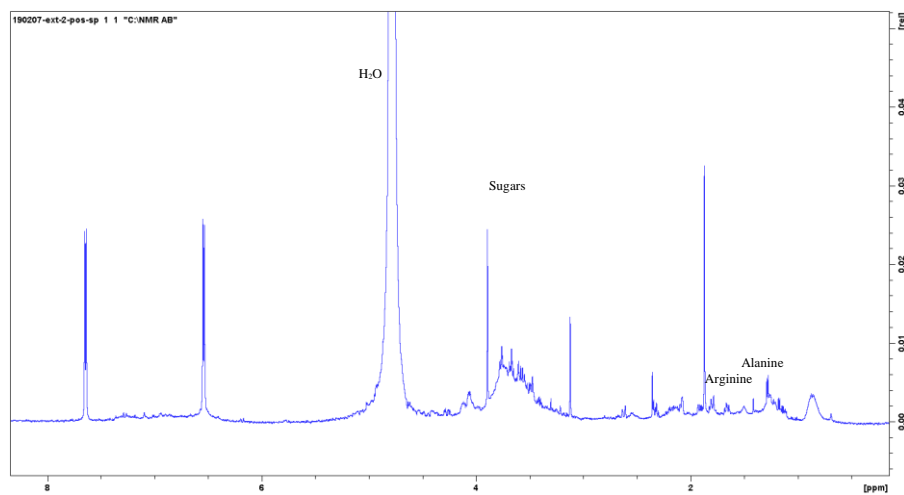

**Figure S19** Extraction 2, 1D  $^1\text{H}$ -NMR of PO Residues

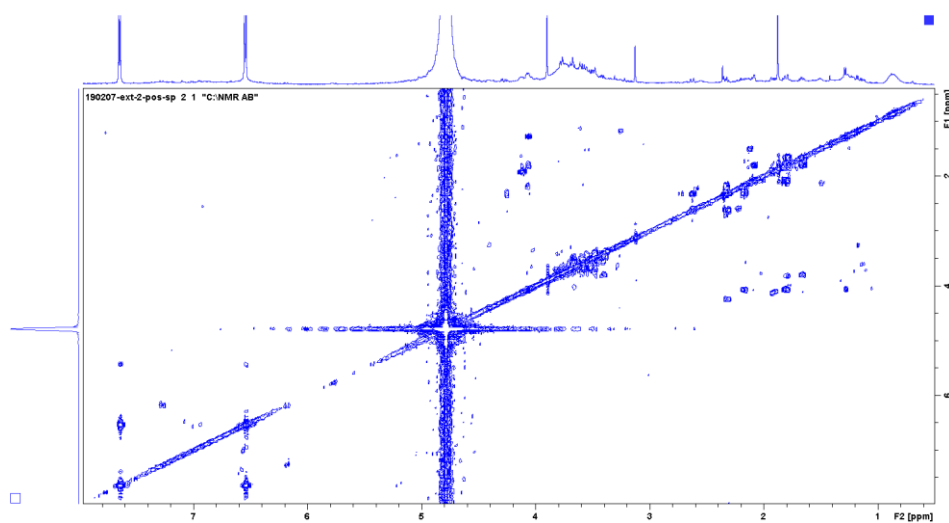

**Figure S20** Extraction 2, 2D  $^1\text{H}$ - $^1\text{H}$ -NMR COSY of PO Residues

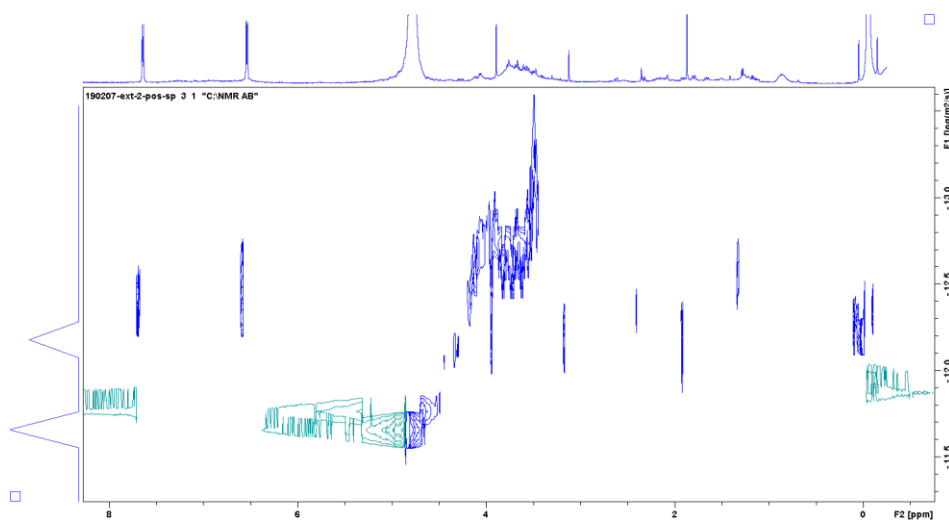

**Figure S21** Extraction 2, 2D  $^1\text{H}$ - $^1\text{H}$ -NMR DOSY of PO Residues

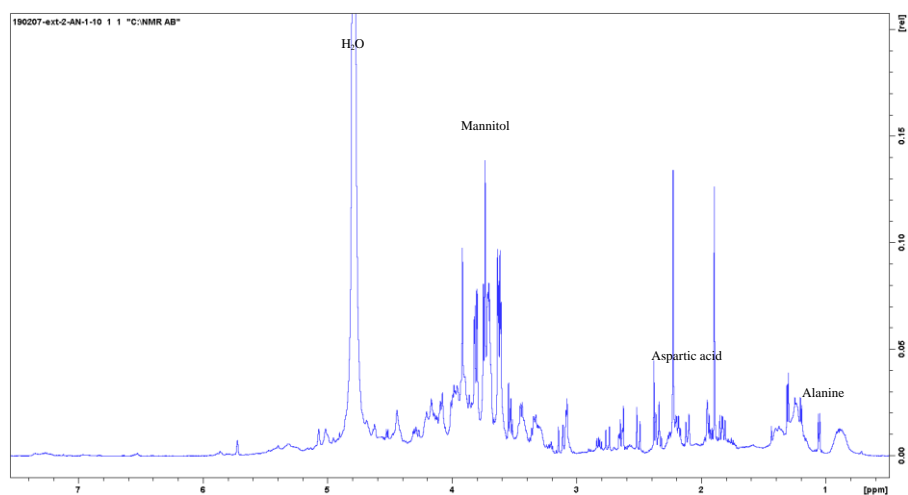

**Figure S22** Extraction 2, 1D  $^1\text{H}$ -NMR of AN

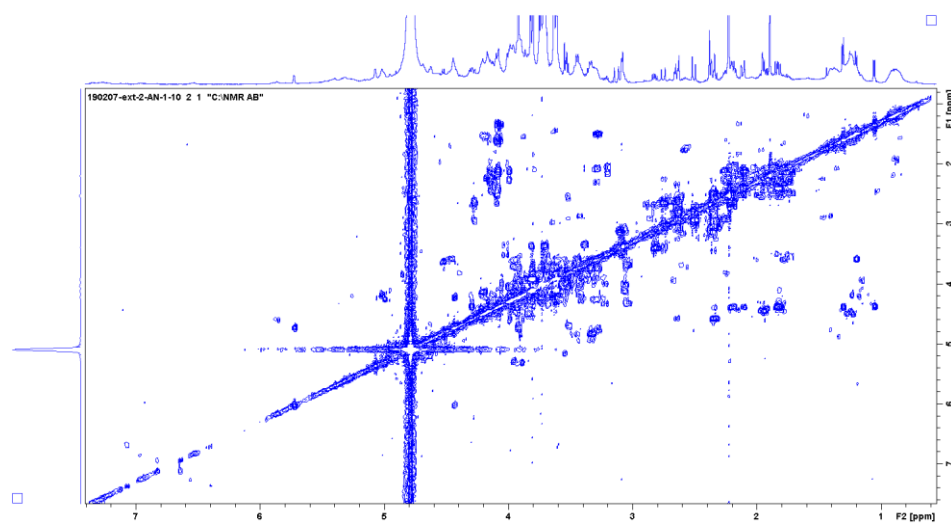

**Figure S23** Extraction 2, 2D  $^1\text{H}$ - $^1\text{H}$ -NMR COSY of AN

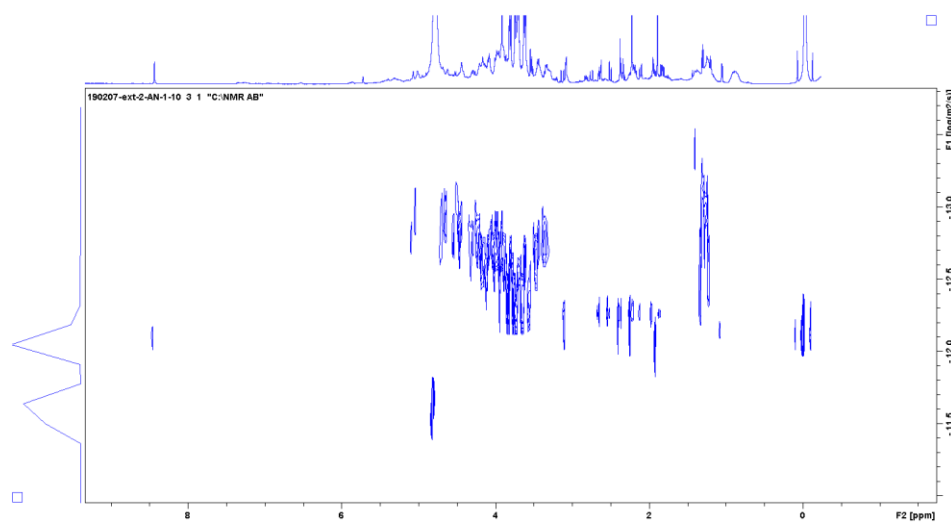

**Figure S24** Extraction 2, 2D  $^1\text{H}$ - $^1\text{H}$ -NMR DOSY of AN



**ESTRAZIONE 3: FIG.25-27 PO ROOTS, FIG. 28-30 PO LEAVES, FIG.31-33 PO RESIDUES, FIG.34-36 AN**

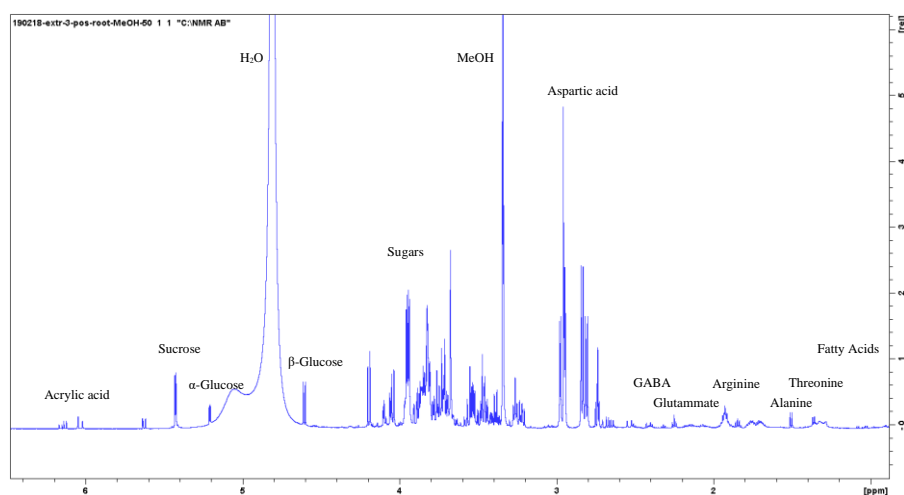

**Figure S25** Extraction 3, 1D  $^1\text{H}$ -NMR of Roots

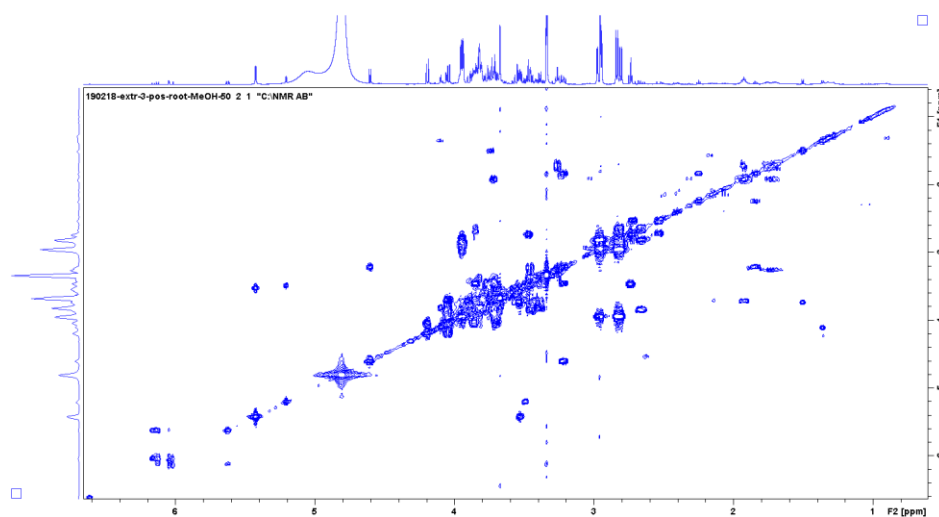

**Figure S26** Extraction 3, 2D  $^1\text{H}$ - $^1\text{H}$ -NMR COSY of Roots

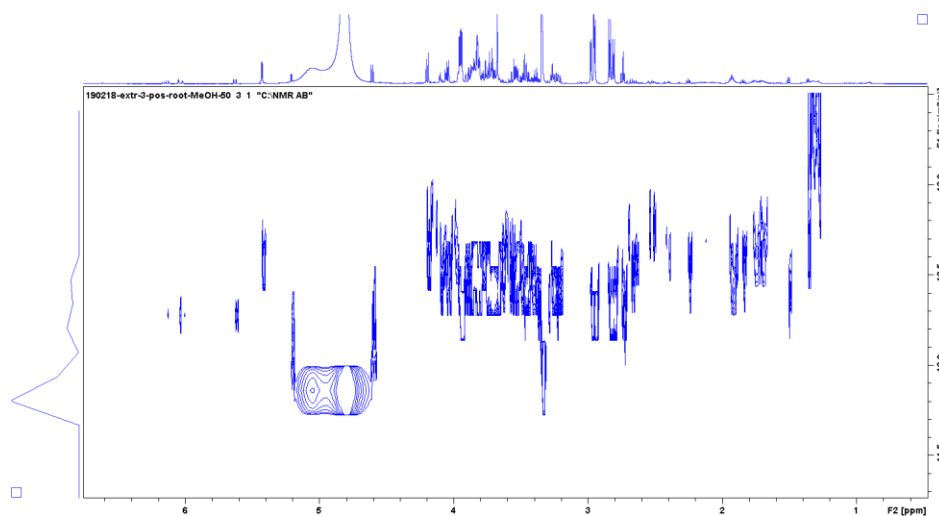

**Figure S27** Extraction 3, 2D  $^1\text{H}$ - $^1\text{H}$ -NMR DOSY of PO Roots

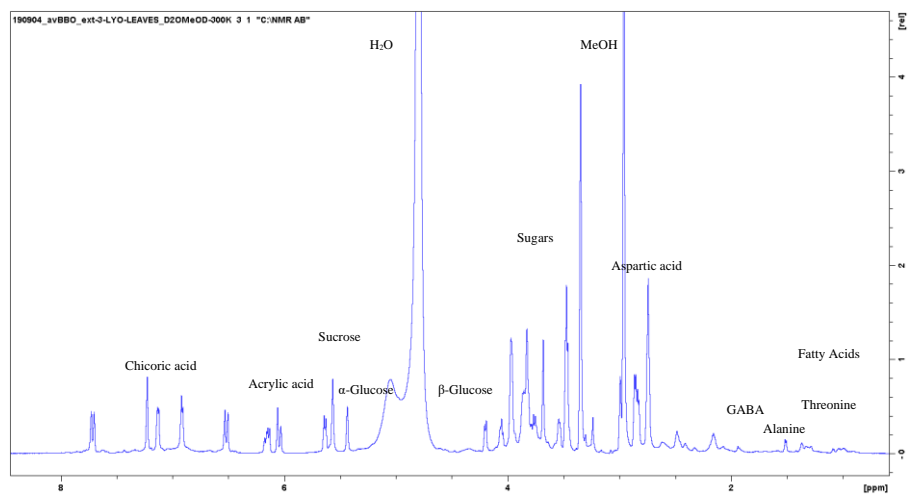

**Figure S28** Extraction 3, 1D  $^1\text{H}$ -NMR of PO Leaves

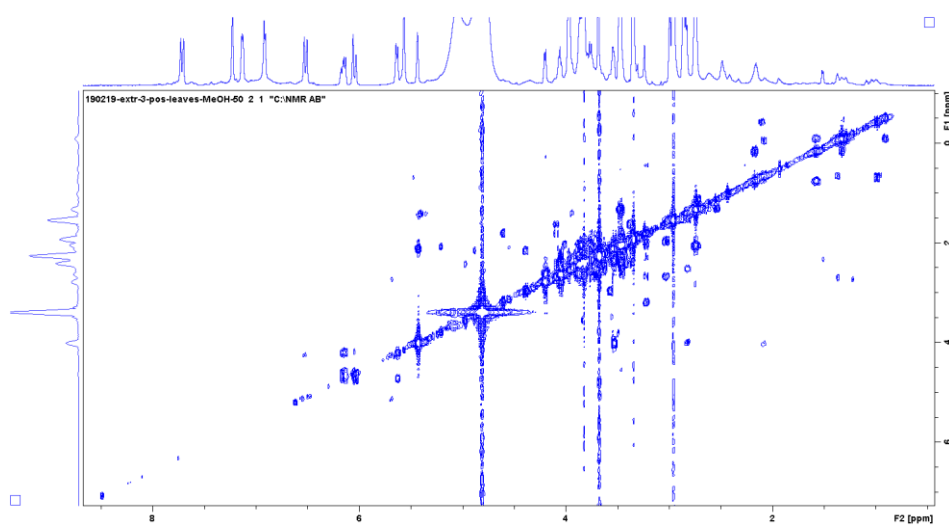

**Figure S29** Extraction 3, 2D  $^1\text{H}$ - $^1\text{H}$ -NMR COSY of PO Leaves

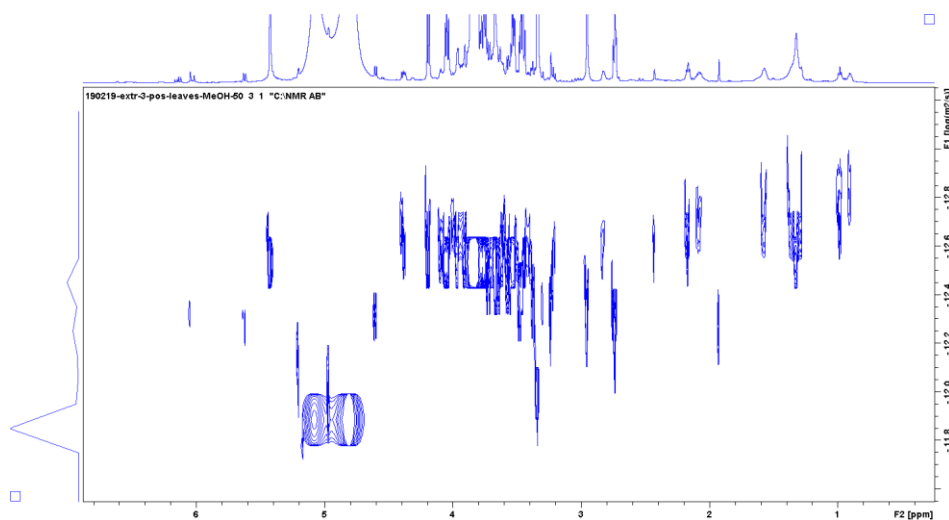

**Figure S30** Extraction 3, 2D  $^1\text{H}$ - $^1\text{H}$ -NMR DOSY of PO Roots

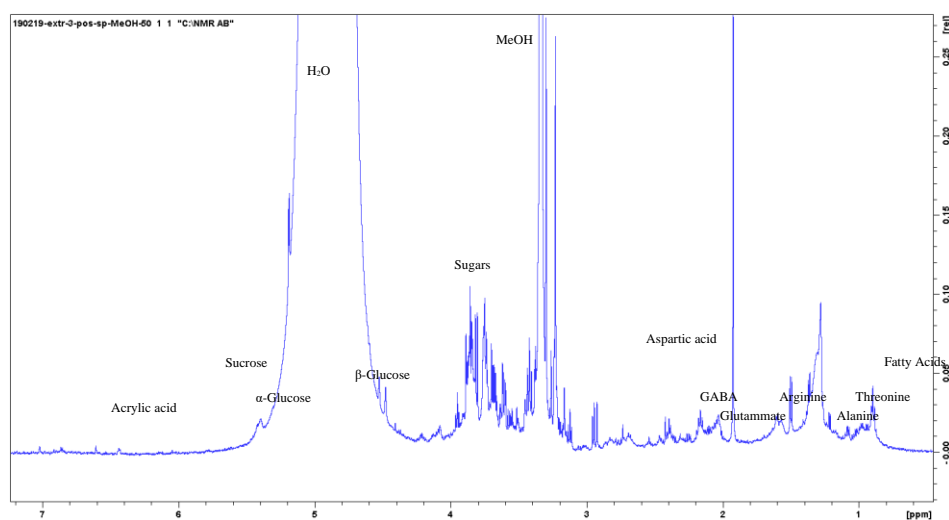

**Figure S31** Extraction 3, 1D  $^1\text{H}$ -NMR of PO Residues

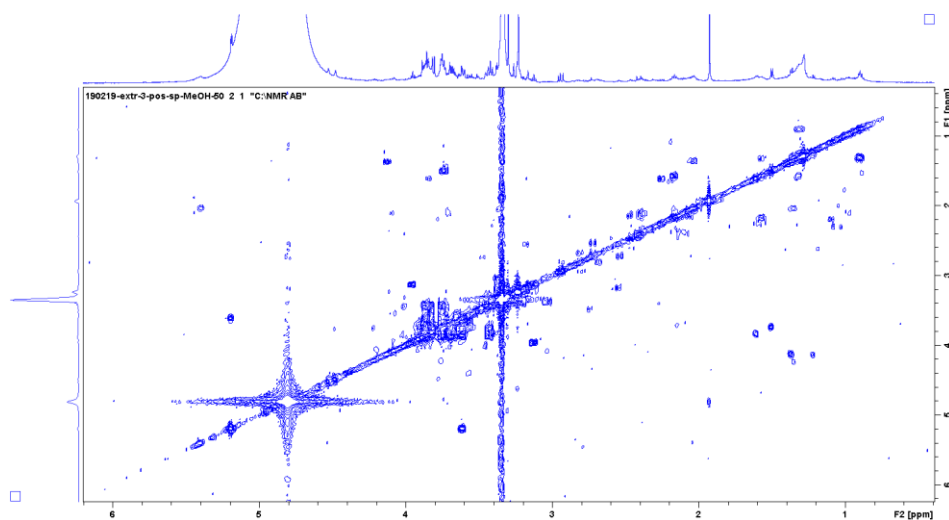

**Figure S32** Extraction 3, 2D  $^1\text{H}$ - $^1\text{H}$ -NMR COSY of PO Residues

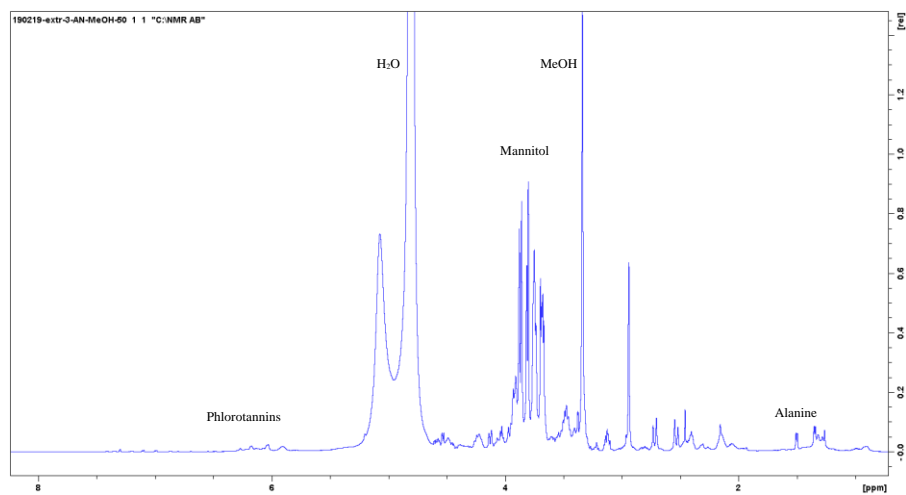

**Figure S34** Extraction 3, 1D  $^1\text{H}$ -NMR of AN

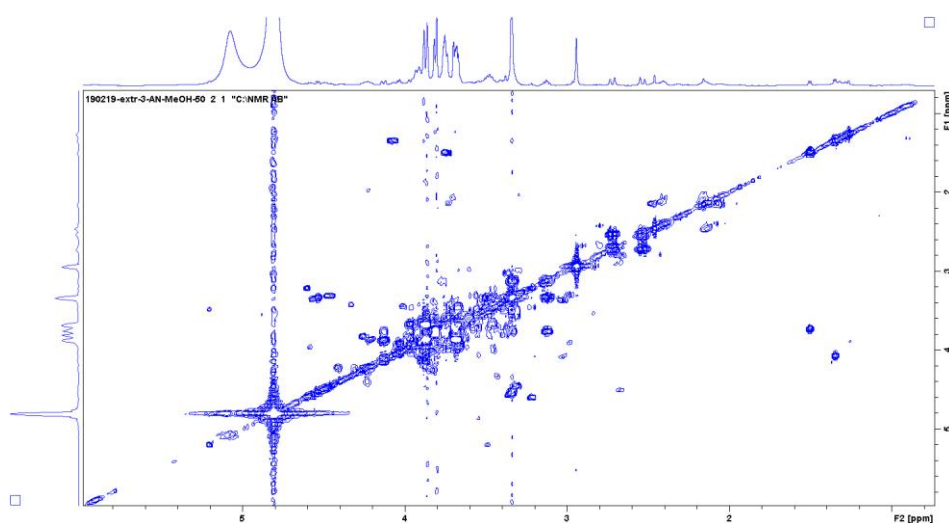

**Figure S35** Extraction 3, 2D  $^1\text{H}$ - $^1\text{H}$ -NMR COSY of AN

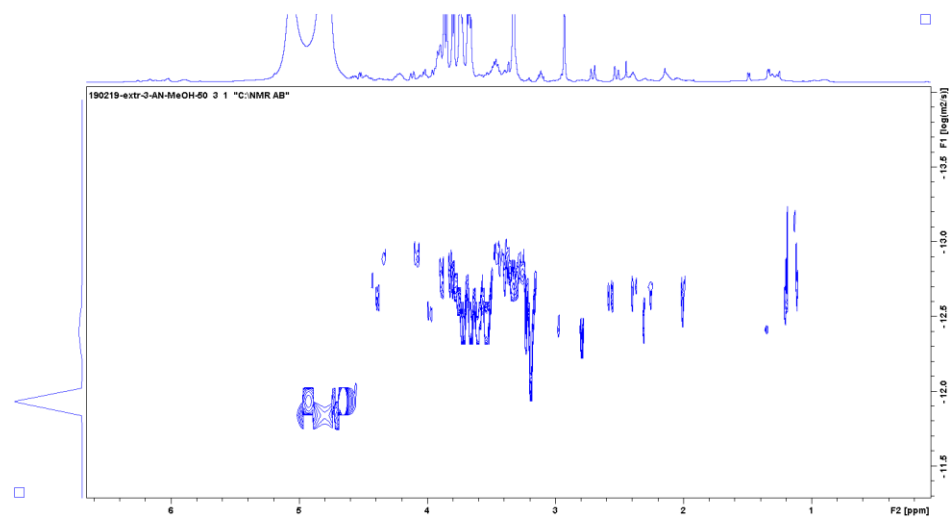

**Figure S36** Extraction 3, 2D  $^1\text{H}$ - $^1\text{H}$ -NMR DOSY of AN

**ESTRAZIONE 4: FIG.37-39 PO ROOTS, FIG. 40-42 PO LEAVES, FIG.43-45 PO RESIDUES, FIG.46-48 AN**

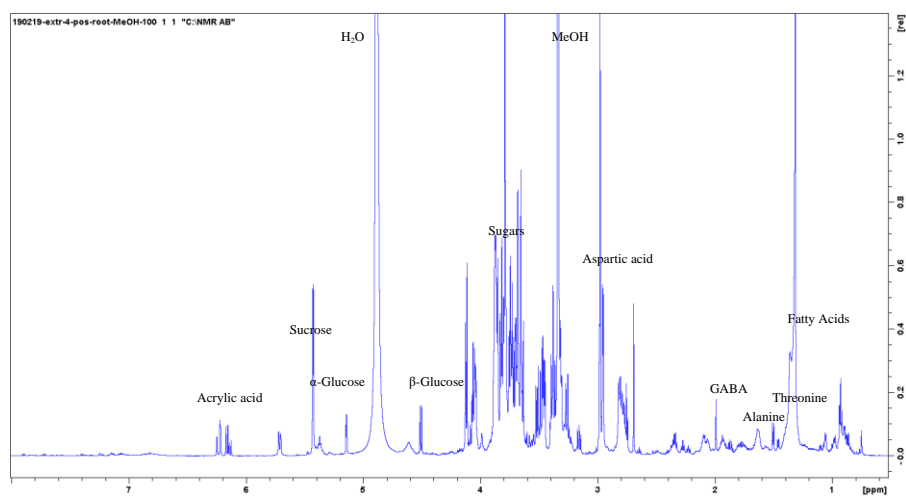

**Figure S37** Extraction 4, 1D  $^1\text{H}$ -NMR of PO Roots

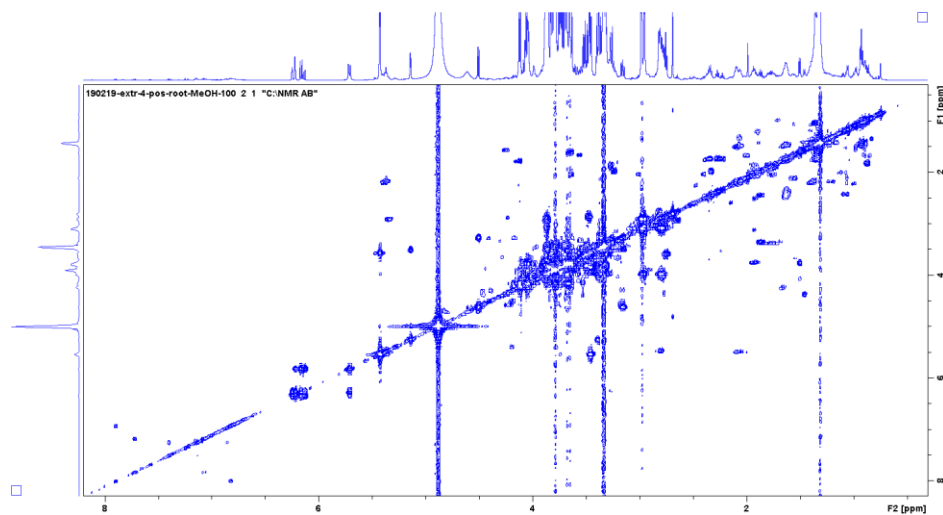

**Figure S38** Extraction 4, 2D  $^1\text{H}$ - $^1\text{H}$ -NMR COSY PO Roots

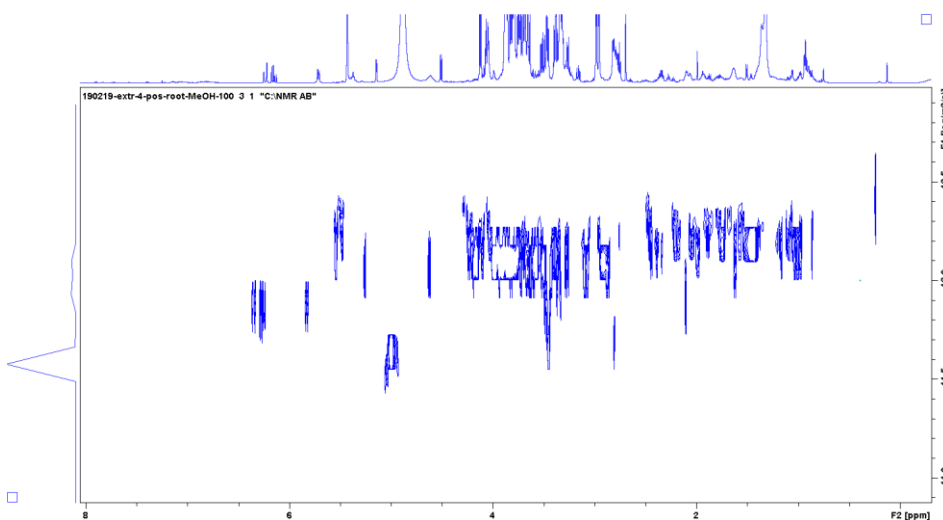

**Figure S39** Extraction 4, 2D  $^1\text{H}$ - $^1\text{H}$ -NMR DOSY of PO Roots

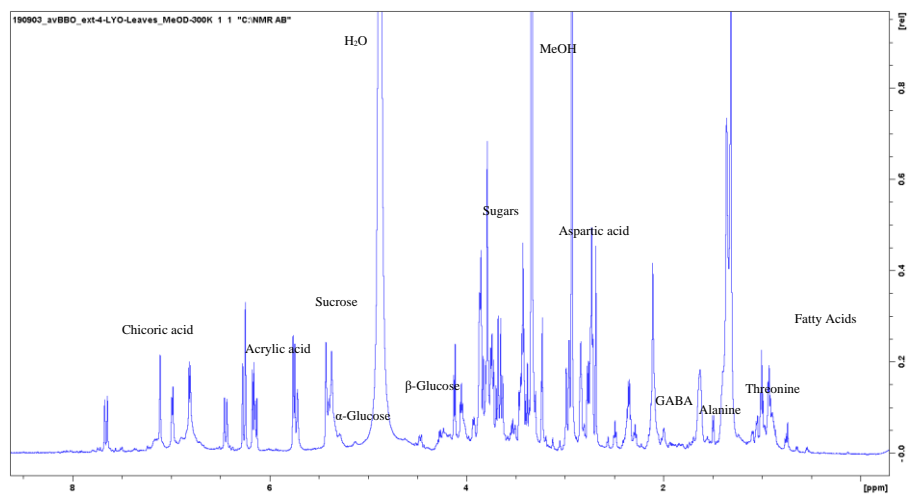

**Figure S40** Extraction 4, 1D  $^1\text{H}$ -NMR of PO Leaves

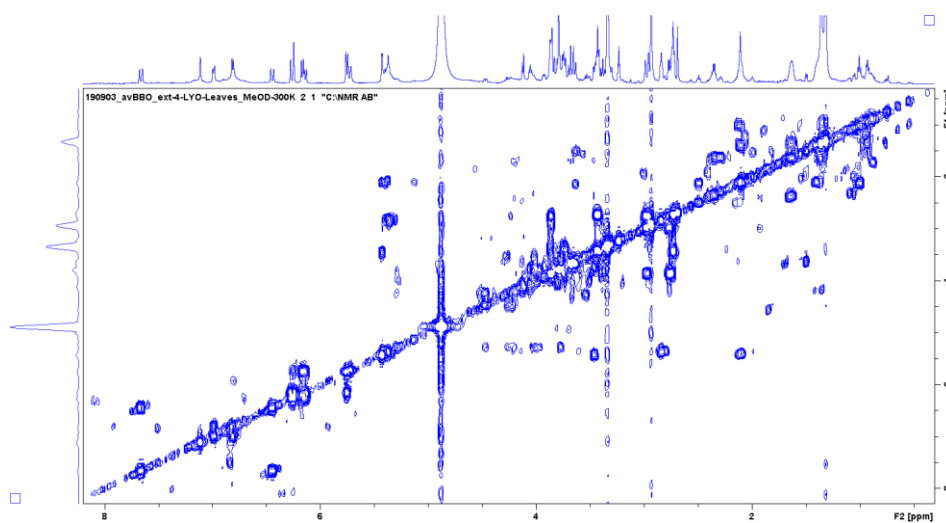

**Figure S41** Extraction 4, 2D  $^1\text{H}$ - $^1\text{H}$ -NMR COSY PO Leaves

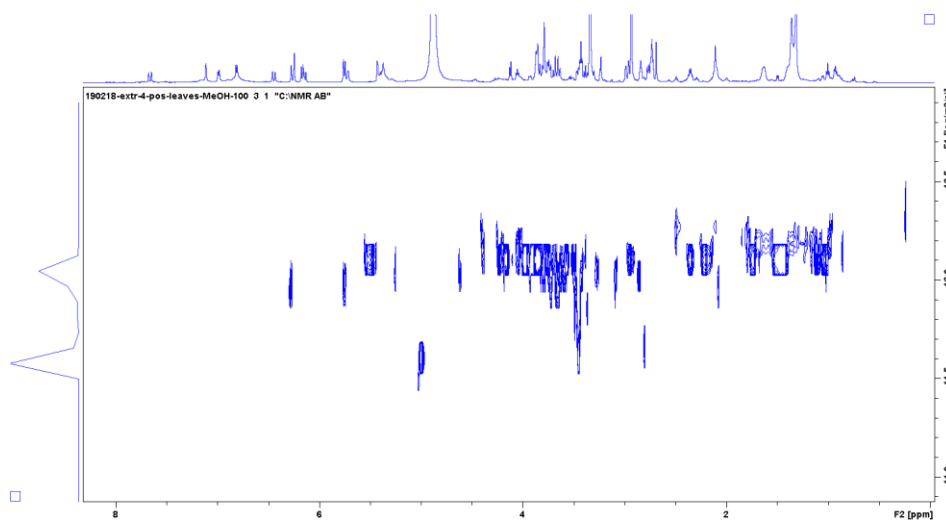

**Figure S42** Extraction 4, 2D  $^1\text{H}$ - $^1\text{H}$ -NMR DOSY of PO Leaves

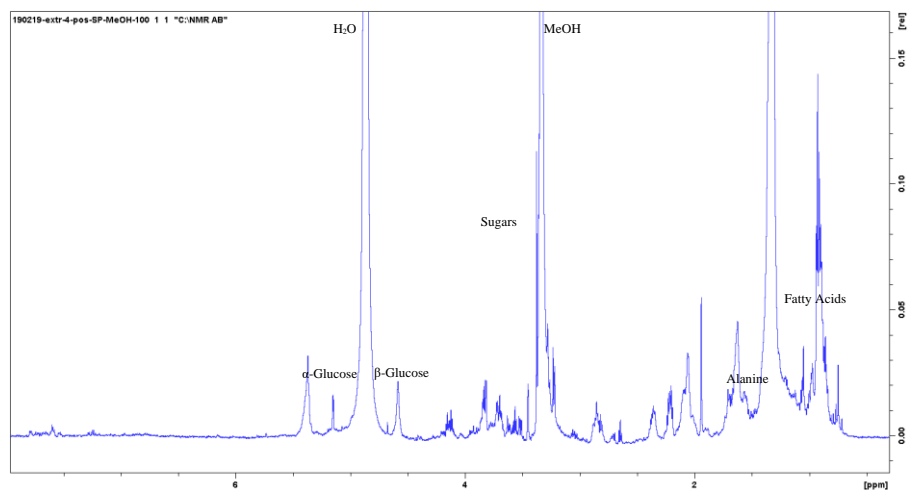

**Figure S343** Extraction 4, 1D  $^1\text{H}$ -NMR of PO Residues

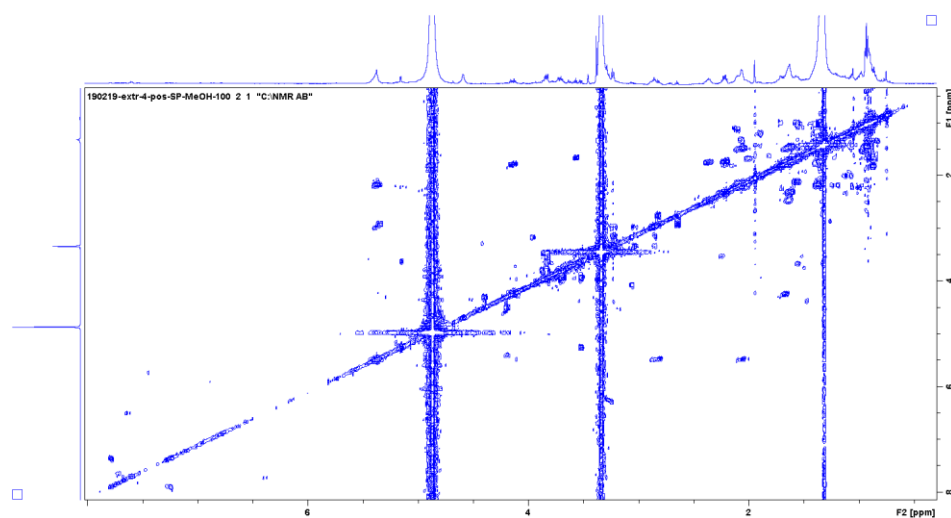

**Figure S44** Extraction 4, 2D  $^1\text{H}$ - $^1\text{H}$ -NMR COSY PO Residues

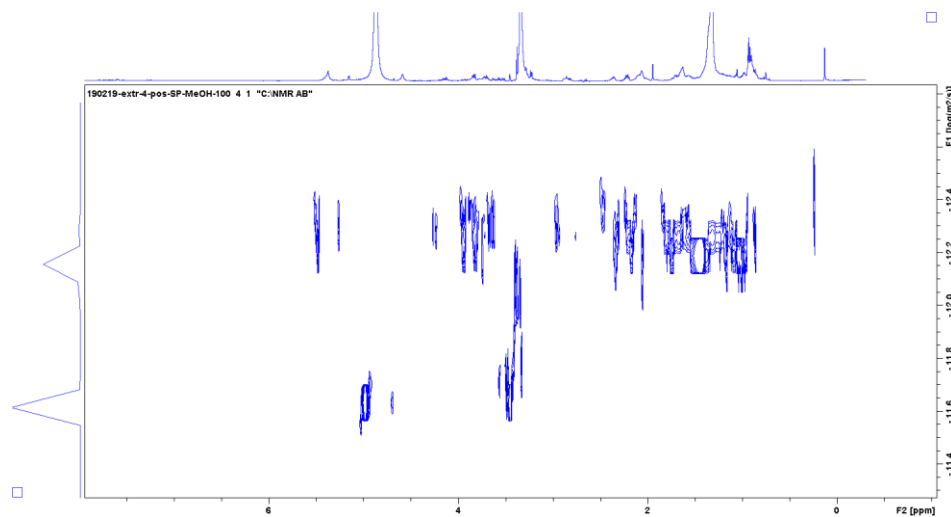

**Figure S45** Extraction 4, 2D  $^1\text{H}$ - $^1\text{H}$ -NMR DOSY of PO Residues

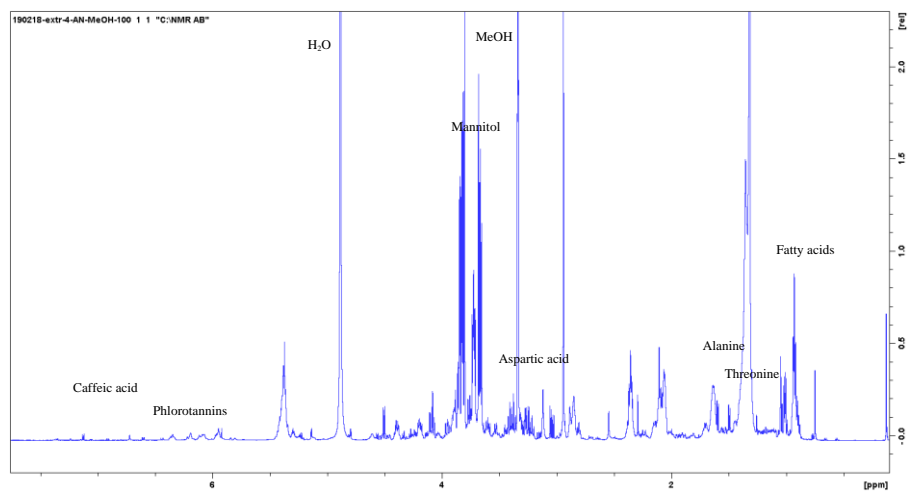

**Figure S46** Extraction 4, 1D <sup>1</sup>H-NMR of AN

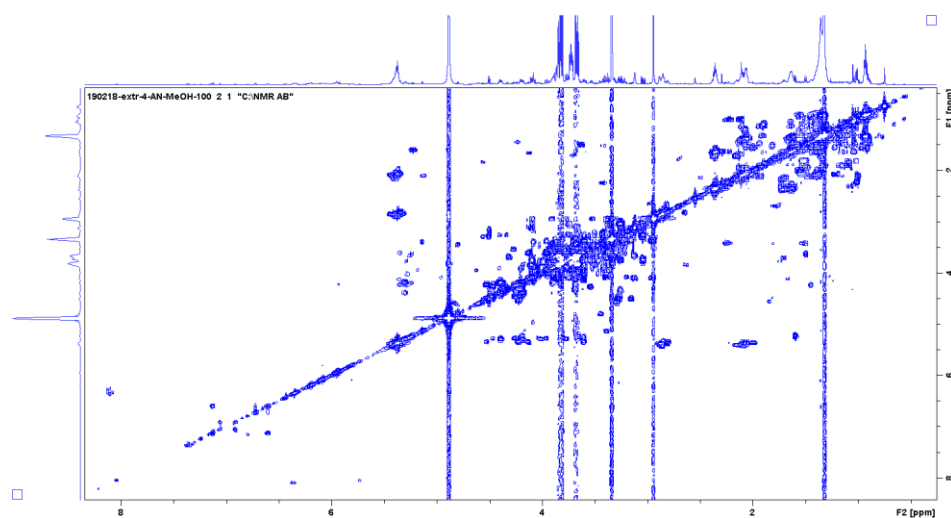

**Figure S47** Extraction 4, 2D <sup>1</sup>H-<sup>1</sup>H-NMR COSY AN

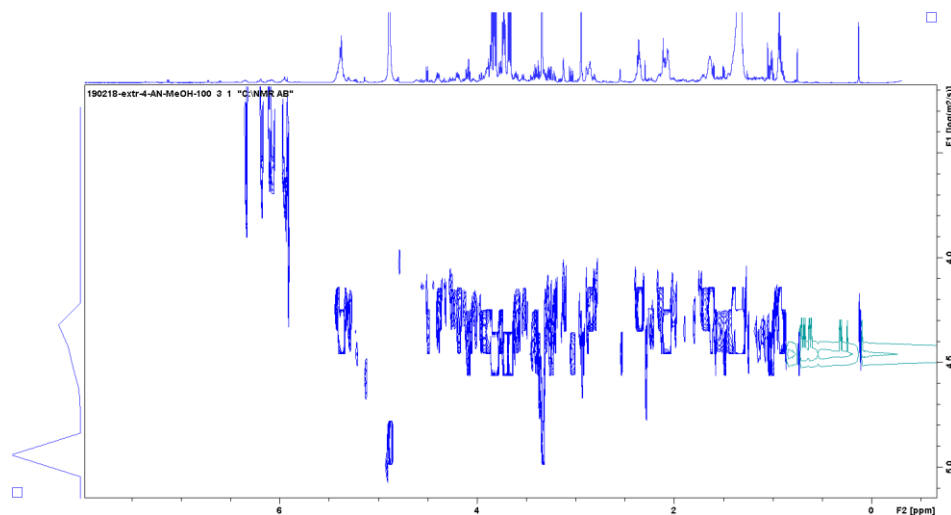

**Figure S48** Extraction 4, 2D <sup>1</sup>H-<sup>1</sup>H-NMR DOSY of AN
